# Supplementary material for: Mutation of the CH1 Domain in the Histone Acetyltransferase CREBBP Results in Autism-Relevant Behaviors in Mice
Source: PubMed Central journal article supplement (PMC4701386; doi:10.1371/journal.pone.0146366), 2016-01-05

## S2 Figure

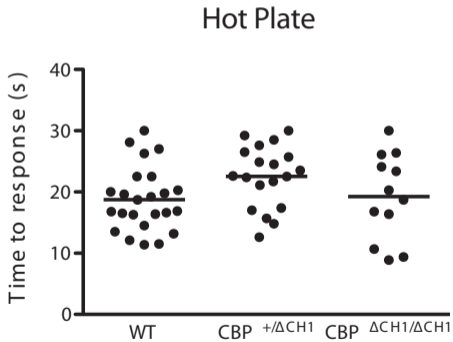

Supplement: pone.0146366.s002.pdf [file pone.0146366.s002.pdf]
