# Supplementary material for: Mutation of the CH1 Domain in the Histone Acetyltransferase CREBBP Results in Autism-Relevant Behaviors in Mice
Source: PubMed Central journal article supplement (PMC4701386; doi:10.1371/journal.pone.0146366), 2016-01-05
Supplement: pone.0146366.s003.pdf [file pone.0146366.s003.pdf]

**S1 Table. Phenotype comparison of CBP and Mecp2 mutant mouse models.**

|                                      | <b>CBP<sup>ΔCH1/ΔCH1</sup></b> | <b>CBP<sup>+/-</sup></b>          | <b>CBP Trunc</b>                           | <b>CBPKIX</b>                                         | <b>CBPcKO</b>                             | <b>CBPΔ1</b>                                | <b>Mecp2<sup>-Y</sup></b>                     | <b>Mecp2<sup>308Y</sup></b>               | <b>Mecp2-e1<sup>-Y</sup></b>                       |
|--------------------------------------|--------------------------------|-----------------------------------|--------------------------------------------|-------------------------------------------------------|-------------------------------------------|---------------------------------------------|-----------------------------------------------|-------------------------------------------|----------------------------------------------------|
| <b>Mutations</b>                     | Deletion in CH1 domain in CBP  | Deletion from exon 2 <sup>a</sup> | Truncation at amino acid 1084 <sup>b</sup> | Triple point mutations in CBP KIX domain <sup>c</sup> | Deletion of CBP in forebrain <sup>d</sup> | O/E truncated CBP in forebrain <sup>h</sup> | Deletion of exon 3 or exon 3 & 4 <sup>e</sup> | Truncation at amino acid 308 <sup>f</sup> | Mutation in exon 1 (e1 form deletion) <sup>g</sup> |
| <b>Stereotypies</b>                  | Forepaw rubbing; Self grooming | N.R.                              | N.R.                                       | N.O.P.                                                | N.R.                                      | N.R.                                        | Self grooming                                 | Forepaw rubbing; Self grooming            | Forepaw rubbing; Self grooming                     |
| <b>Spasticity</b>                    | N.O.P.                         | N.R.                              | N.R.                                       | N.O.P.                                                | N.R.                                      | N.R.                                        | Hindlimb claspings                            | Hindlimb claspings                        | Hindlimb claspings                                 |
| <b>Social behavior abnormalities</b> | Yes                            | N.R.                              | N.R.                                       | N.R.                                                  | N.R.                                      | N.R.                                        | Yes                                           | Yes                                       | Yes                                                |
| <b>Motor dysfunction</b>             | Yes                            | Yes                               | N.R.                                       | Yes                                                   | No                                        | No                                          | Yes                                           | Yes                                       | Yes                                                |
| <b>Locomotor activity</b>            | Hyperactivity                  | Normal                            | Hypoactivity                               | Normal                                                | Normal                                    | Normal                                      | Hypoactivity                                  | Hypoactivity                              | Normal                                             |
| <b>Anxiety</b>                       | Decreased                      | Normal                            | Normal                                     | Normal                                                | Normal                                    | Normal                                      | Decreased                                     | Increased                                 | Decreased                                          |
| <b>Learning and memory deficits</b>  | Yes                            | Yes                               | Yes                                        | Yes                                                   | Yes                                       | Yes                                         | Yes                                           | Yes                                       | N.R.                                               |
| <b>LTP</b>                           | Enhanced                       | Reduced                           | Reduced                                    | Reduced                                               | N.R.                                      | Reduced                                     | Reduced                                       | Reduced                                   | N.R.                                               |

- <sup>a</sup> Tanaka et al., 1997, Alarcon et al., 2004
- <sup>b</sup> Oike et al., 1999
- <sup>c</sup> Wood et al., 2006
- <sup>d</sup> Valor et al., 2011
- <sup>e</sup> Wood et al., 2005
- <sup>f</sup> Chen et al., 2001, Guy et al., 2001
- <sup>g</sup> Shahbazian et al., 2002, Moretti et al., 2006
- <sup>h</sup> Yasui et al., 2014

### **Supplemental Reference:**

- Alarcon JM, Malleret G, Touzani K, Vronskaya S, Ishii S, Kandel ER, Barco A (2004) Chromatin acetylation, memory, and LTP are impaired in CBP<sup>+/-</sup> mice: a model for the cognitive deficit in Rubinstein-Taybi syndrome and its amelioration. *Neuron* 42:947-959.
- Chen RZ, Akbarian S, Tudor M, Jaenisch R (2001) Deficiency of methyl-CpG binding protein-2 in CNS neurons results in a Rett-like phenotype in mice. *Nat Genet* 27:327-331.
- Guy J, Hendrich B, Holmes M, Martin JE, Bird A (2001) A mouse *Mecp2*-null mutation causes neurological symptoms that mimic Rett syndrome. *Nat Genet* 27:322-326.
- Moretti P, Levenson JM, Battaglia F, Atkinson R, Teague R, Antalffy B, Armstrong D, Arancio O, Sweatt JD, Zoghbi HY (2006) Learning and memory and synaptic plasticity are impaired in a mouse model of Rett syndrome. *J Neurosci* 26:319-327.
- Oike Y, Hata A, Mamiya T, Kaname T, Noda Y, Suzuki M, Yasue H, Nabeshima T, Araki K, Yamamura K (1999) Truncated CBP protein leads to classical Rubinstein-Taybi syndrome phenotypes in mice: implications for a dominant-negative mechanism. *Hum Mol Genet* 8:387-396.
- Shahbazian M, Young J, Yuva-Paylor L, Spencer C, Antalffy B, Noebels J, Armstrong D, Paylor R, Zoghbi H (2002) Mice with truncated MeCP2 recapitulate many Rett syndrome features and display hyperacetylation of histone H3. *Neuron* 35:243-254.
- Tanaka Y, Naruse I, Maekawa T, Masuya H, Shiroishi T, Ishii S (1997) Abnormal skeletal patterning in embryos lacking a single *Cbp* allele: a partial similarity with Rubinstein-Taybi syndrome. *Proc Natl Acad Sci U S A* 94:10215-10220.
- Valor LM, Pulpulos MM, Jimenez-Minchan M, Olivares R, Lutz B, Barco A (2011) Ablation of CBP in forebrain principal neurons causes modest memory and transcriptional defects and a dramatic reduction of histone acetylation but does not affect cell viability. *J Neurosci* 31:1652-1663.
- Wood MA, Attner MA, Oliveira AM, Brindle PK, Abel T (2006) A transcription factor-binding domain of the coactivator CBP is essential for long-term memory and the expression of specific target genes. *Learn Mem* 13:609-617.
- Wood MA, Kaplan MP, Park A, Blanchard EJ, Oliveira AM, Lombardi TL, Abel T (2005) Transgenic mice expressing a truncated form of CREB-binding protein (CBP) exhibit deficits in hippocampal synaptic plasticity and memory storage. *Learning & memory* 12:111-119.
