# Supplementary material for: Mutation of the CH1 Domain in the Histone Acetyltransferase CREBBP Results in Autism-Relevant Behaviors in Mice
Source: PubMed Central journal article supplement (PMC4701386; doi:10.1371/journal.pone.0146366), 2016-01-05
Supplement: pone.0146366.s004.pdf [file pone.0146366.s004.pdf]

**S2 Table. Bioinformatic analysis of *CREBBP* and *EP300* de novo ASD mutations identified by lossifov *et al.* .**

| Gene   | Human Chrom | Variant base | Effect   | Residue affected | Mutation | Conserved residue?                 | Domain      |
|--------|-------------|--------------|----------|------------------|----------|------------------------------------|-------------|
| CREBBP | 16:3842074  | C->T         | missense | Arg413           | R413Q    | highly (vertebrate & invertebrate) | CH1         |
| CREBBP | 16:3786149  | T->C         | missense | Tyr1539          | Y1539C   | highly (vertebrate & invertebrate) | HAT         |
| CREBBP | 16:3786060  | T->C         | missense | Thr1569          | T1569A   | partly (vertebrate)                | HAT         |
| CREBBP | 16:3779789  | G->C         | silent   | Gly1753          | G1753G   | NA                                 | interdomain |
| EP300  | 22:41527522 | G->A         | silent   | Pro481           | P481P    | NA                                 | interdomain |
| EP300  | 22:41572350 | C->T         | missense | Arg1627          | R1627W   | highly (vertebrate & invertebrate) | HAT         |
| EP300  | 22:41573317 | A->C         | missense | Thr1868          | T1868P   | partly (vertebrate p300)           | interdomain |
